# Supplementary material for: Enhanced room-temperature NO2 sensing properties of biomorphic hierarchical mixed phase WO3
Source: Royal Society of Chemistry journal article supplement (doi:10.1039/d0nr07093a), 2020-01-01
Supplement: d0nr07093a1.pdf [file d0nr07093a1.pdf]

## Electronic Supplementary Information

### Enhanced room-temperature NO<sub>2</sub> sensing properties of biomorphic hierarchical mixed phase WO<sub>3</sub>

He Lv<sup>a</sup>, Zhuo Liu<sup>a</sup>, Junkun Chen<sup>a</sup>, Muhammad Ikram<sup>a</sup>, Xue Bai<sup>a</sup>, Jue Wang, Baihe Sun, Kan Kan<sup>\*b</sup>, and Keying Shi<sup>\*a</sup>

<sup>a</sup> Key Laboratory of Functional Inorganic Material Chemistry, Ministry of Education. School of Chemistry and

Material Science, Heilongjiang University, Harbin, 150080, P. R. China. E-mail: shikeying2008@163.com

<sup>b</sup> Heilongjiang Academy of Sciences, Institute of Advanced Technology, Harbin 150020, P. R. China. E-mail:

kankan.has@foxmail.com

## Table of contents

|     |                                                                                                                                                                                                                                                                                                                                                                                    |
|-----|------------------------------------------------------------------------------------------------------------------------------------------------------------------------------------------------------------------------------------------------------------------------------------------------------------------------------------------------------------------------------------|
| P1  | Cover page                                                                                                                                                                                                                                                                                                                                                                         |
| P2  | <b>Table of contents</b>                                                                                                                                                                                                                                                                                                                                                           |
| P3  | <b>Table S1</b> The sensing performance of the single crystal phase WO <sub>3</sub> for NO <sub>2</sub> gas sensing                                                                                                                                                                                                                                                                |
| P4  | <b>Table S2</b> Comparison of gas sensing performance of the WO <sub>3</sub> based composite towards NO <sub>2</sub> gas with previous reported work.                                                                                                                                                                                                                              |
| P5  | <b>Table S3</b> Previous effort of mixed-phase materials used in different fields.                                                                                                                                                                                                                                                                                                 |
| P6  | <b>Table S4</b> Previous effort of bio-template materials used in different fields.<br><b>Table S5</b> Experimental conditions and crystal type of B-WO <sub>3</sub> -ab and pure WO <sub>3</sub> -ab materials.                                                                                                                                                                   |
| P7  | <b>Fig. S1</b> I <sub>m</sub> and I <sub>h</sub> values of hexagonal (JCPDS 33-1387) and monoclinic (JCPDS 72-0677) phases of (a) BC-WO <sub>3</sub> -22, (b) BC-WO <sub>3</sub> -04, and (c) BC-WO <sub>3</sub> -24.<br><b>Fig. S2</b> Energy-dispersive X-ray spectroscopy (EDS) analysis of (a) B-WO <sub>3</sub> -22, (b) B-WO <sub>3</sub> -04, (c) B-WO <sub>3</sub> -24.    |
| P8  | <b>Fig. S3</b> XRD, FTIR and Raman of biomass carbon.                                                                                                                                                                                                                                                                                                                              |
| P9  | <b>Fig. S4</b> The TEM/HRTEM/SAED pattern images of B-WO <sub>3</sub> -04.<br><b>Fig. S5</b> The TEM Mapping images of B-WO <sub>3</sub> -04.                                                                                                                                                                                                                                      |
| P10 | <b>Fig. S6</b> Nitrogen adsorption-desorption isotherms of hemp-derived biomass carbon and B-WO <sub>3</sub> -ab.<br><b>Fig. S7</b> Comparison of the XPS full spectra of B-WO <sub>3</sub> -22, B-WO <sub>3</sub> -04 and B-WO <sub>3</sub> -24.<br><b>Table S6</b> Contents of C, O, W, and Na in XPS of B-WO <sub>3</sub> -22, B-WO <sub>3</sub> -04 and B-WO <sub>3</sub> -24. |
| P11 | <b>Table S7</b> Response, response time and recovery time of B-WO <sub>3</sub> -22, B-WO <sub>3</sub> -04, and B-WO <sub>3</sub> -24 sensors.<br><b>Fig. S8</b> Dynamic response-recovery curve of pure WO <sub>3</sub> -40 and WO <sub>3</sub> -04.<br><b>Table S8</b> Response, response time and recovery time of WO <sub>3</sub> -40 and WO <sub>3</sub> -04.                  |
| P12 | <b>Fig. S9</b> Response of the B-WO <sub>3</sub> -04 sensor to 100 ppm NO <sub>2</sub> as a function of the relative humidity.<br><b>Table S9</b> Fitted impedance parameters of B-WO <sub>3</sub> -22, B-WO <sub>3</sub> -04, and B-WO <sub>3</sub> -24 samples.                                                                                                                  |
|     | <b>References</b>                                                                                                                                                                                                                                                                                                                                                                  |

**Table S1** The sensing performance of the single crystal phase WO<sub>3</sub> for NO<sub>2</sub> gas sensing.

| <b>Morphology</b>              | <b>Crystal type of WO<sub>3</sub></b> | <b>NO<sub>2</sub> (ppm)</b> | <b>Operating temperature (°C)</b> | <b>Response</b> | <b>LOD</b> | <b>Ref.</b> |
|--------------------------------|---------------------------------------|-----------------------------|-----------------------------------|-----------------|------------|-------------|
| nanoparticles                  | hexagonal or monoclinic               | 5                           | 100                               | 251.7           | 50 ppb     | 1           |
| nanotubes                      | monoclinic                            | 5                           | 300                               | 100.3           | >20 ppb    | 2           |
| nanorods                       | monoclinic                            | 10                          | 225                               | 2.02            | 2 ppm      | 3           |
| nanosheets                     | Hexagonal or monoclinic               | 1                           | 100                               | 62.1            | 100 ppb    | 4           |
| thin films                     | monoclinic                            | 5                           | 150                               | 5.75            | 1 ppm      | 5           |
| nanoplates                     | orthorhombic                          | 5                           | 100                               | 10              | 1 ppm      | 6           |
| dendrites                      | hexagonal                             | 5                           | 140                               | 32.9            | 20 ppb     | 7           |
| ultrathin nanosheet            | monoclinic                            | 50 ppb                      | 140                               | 5.67            | 10 ppb     | 8           |
| thin film                      | monoclinic                            | 200                         | 200                               | 38%             | 50 ppm     | 9           |
| flower-like                    | monoclinic                            | 80 ppb                      | 90                                | 190.8           | 5 ppb      | 10          |
| yolk-shell spheres             | monoclinic                            | 100 ppb                     | 100-200                           | 120             | 30 ppb     | 11          |
| cuboid or hexagonal plate-like | monoclinic or hexagonal               | 20 ppb<br>500 ppb           | 200<br>200                        | 160<br>120      |            | 12          |

**Table S2** Comparison of gas sensing performance of the WO<sub>3</sub> based composite towards NO<sub>2</sub> gas with previous reported work.

| Sensing materials                           | NO <sub>2</sub> (ppm) | Operating temperature (°C) | Response | t <sub>res</sub> /t <sub>rec</sub> | LOD    | Recoverability | Refs.        |
|---------------------------------------------|-----------------------|----------------------------|----------|------------------------------------|--------|----------------|--------------|
| APTES-functionalized porous WO <sub>3</sub> | 10                    | 340                        | 184      | 11s/12s                            | 10 ppb | complete       | 13           |
| Au@WO <sub>3</sub>                          | 5                     | 100                        | 136      | 4s/59s                             | 250ppb | complete       | 14           |
| Sb-doped WO <sub>3</sub>                    | 2                     | 70                         | 343      | 70s/50s                            | 0.5ppm | incomplete     | 15           |
| Au NP-decorated WO <sub>3</sub>             | 1                     | 150                        | 96       | 9s/16s                             | 0.6ppm | complete       | 16           |
| Pd-doped WO <sub>3</sub>                    | 5                     | 150                        | 283.96   | 26s/66s                            | 50ppb  | complete       | 17           |
| WO <sub>3</sub> /ZnO                        | 1                     | 150                        | 168      |                                    | 250ppb | complete       | 18           |
| Au-doped WO <sub>3</sub>                    | 5                     | 175                        | 212.3    | 10s/120s                           | 50ppb  | complete       | 19           |
| WO <sub>3</sub> -rGO                        | 10                    | 90                         | 4.3      | 4.1s/5.8s                          |        | complete       | 20           |
| Sb-WO <sub>3</sub>                          | 10                    | RT                         | 51       |                                    | 1ppm   | incomplete     | 21           |
| Bis-crystalline phase WO <sub>3</sub>       | 100                   | RT                         | 71.07    | 3s/11.6s                           | 50ppb  | complete       | Present work |

**Table S3** Previous effort of mixed-phase materials used in different fields.

| <b>Materials</b>                                              | <b>Synthesis process</b>                                  | <b>Applications</b>                   | <b>References</b> |
|---------------------------------------------------------------|-----------------------------------------------------------|---------------------------------------|-------------------|
| 2H and 1T mixed phase few-layer MoS <sub>2</sub>              | hydrothermal                                              | photocatalytic hydrogen evolution     | 22                |
| rutile and anatase phase TiO <sub>2</sub>                     | electrochemical anodization                               | photocatalytic                        | 23                |
| anatase / rutile phase TiO <sub>2</sub>                       | electrochemical anodization                               | photoelectrochemical                  | 24                |
| 2H and 1T mixed phase MoS <sub>2</sub>                        | solution-exfoliated and anneal                            | hydrogen evolution                    | 25                |
| amorphous/crystalline Ga <sub>2</sub> O <sub>3</sub>          | radio frequency(RF) magnetron sputtering growth technique | Solar-Blind Photodetection            | 26                |
| anatase/rutile/srilankite phase TiO <sub>2</sub>              | flame synthesis                                           | photocatalytic hydrogen evolution     | 27                |
| rhombohedral and tetragonal phase BiFeO <sub>3</sub>          | microscopic resistive switching device                    | epitaxially strained thin film of BFO | 28                |
| monoclinic hexagonal phase WO <sub>3</sub>                    | photocatalytic water splitting                            | solvothermal                          | 29                |
| rutile/anatase phase TiO <sub>2</sub>                         | magnetron sputtering deposition                           | photocatalysts                        | 30                |
| Nb-doped natase and utile phase TiO <sub>2</sub>              | deposition                                                | photocatalysts                        | 31                |
| anatase /rutile phase TiO <sub>2</sub>                        | framework vanadium doping and heat treatments             | photocatalysts                        | 32                |
| $\alpha$ - $\beta$ mixed-phase Ga <sub>2</sub> O <sub>3</sub> | ----                                                      | photocatalytic water splitting        | 33                |
| $\alpha$ - $\delta$ mixed-phase FAPbI <sub>3</sub>            | anneal                                                    | near-infrared emission                | 34                |

**Table S4** Previous effort of bio-template materials used in different fields.

| <b>Biomass Materials</b> | <b>Based Materials</b> | <b>Synthesis process</b>                  | <b>Applications</b>               | <b>Refs.</b> |
|--------------------------|------------------------|-------------------------------------------|-----------------------------------|--------------|
| kiwi peel                | NiS <sub>2</sub>       | hydrothermal                              | electro-chemical sensor           | 34           |
| wood                     | MnO                    | hydrothermal                              | electromagnetic wave absorption   | 35           |
| absorbent cotton         | ZnO                    | impregnation and calcination              | H <sub>2</sub> S gas-sensing      | 36           |
| enteromorpha prolifera   | MoO <sub>3</sub>       | freezer drying                            | glucose colorimetric assay        | 37           |
| cellulose nanocrystals   | WO <sub>3</sub>        | electrospinning                           | H <sub>2</sub> S gas-sensing      | 38           |
| eucheuma                 | CdS                    | freezer drying                            | photocatalytic hydrogen evolution | 39           |
| waste paper pieces       | WO <sub>3</sub>        | tubular coking furnace                    | electrochemical materials         | 40           |
| carrageenan              | FeS                    | calcination in CO <sub>2</sub> atmosphere | sodium-Ion batteries              | 41           |
| seaweed fiber            | SnO <sub>2</sub>       | wet-spinning                              | triethylamine detection           | 42           |

**Table S5** Experimental conditions and crystal type of B-WO<sub>3</sub>-ab and pure WO<sub>3</sub>-ab materials.

| <b>Samples</b>        | <b>Time (h)</b> |              | <b>Crystal type</b>                 |
|-----------------------|-----------------|--------------|-------------------------------------|
|                       | <b>350°C</b>    | <b>450°C</b> |                                     |
| B-WO <sub>3</sub> -22 | 2h              | 2h           | h-WO <sub>3</sub> m-WO <sub>3</sub> |
| B-WO <sub>3</sub> -04 | 0h              | 4h           | h-WO <sub>3</sub> m-WO <sub>3</sub> |
| B-WO <sub>3</sub> -24 | 2h              | 4h           | h-WO <sub>3</sub> m-WO <sub>3</sub> |
| WO <sub>3</sub> -40   | 4h              | 0h           | h-WO <sub>3</sub>                   |
| WO <sub>3</sub> -04   | 0h              | 4h           | m-WO <sub>3</sub>                   |

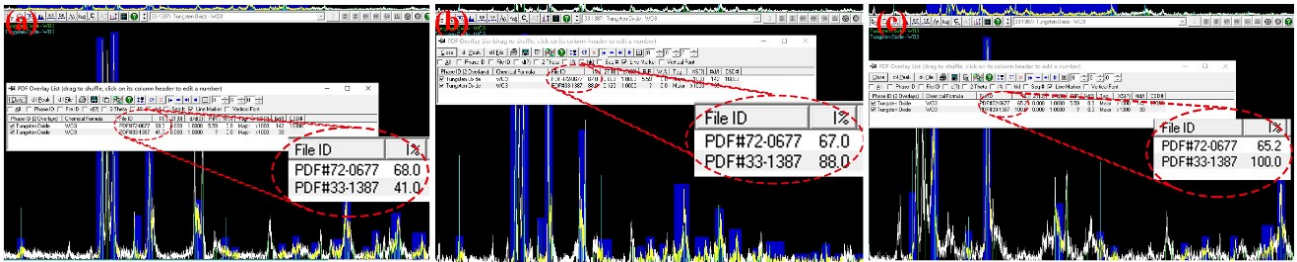

**Fig. S1**  $I_m$  and  $I_h$  values of hexagonal (JCPDS 33-1387) and monoclinic (JCPDS 72-0677) phases of (a) BC-WO<sub>3</sub>-22, (b) BC-WO<sub>3</sub>-04, and (c) BC-WO<sub>3</sub>-24.

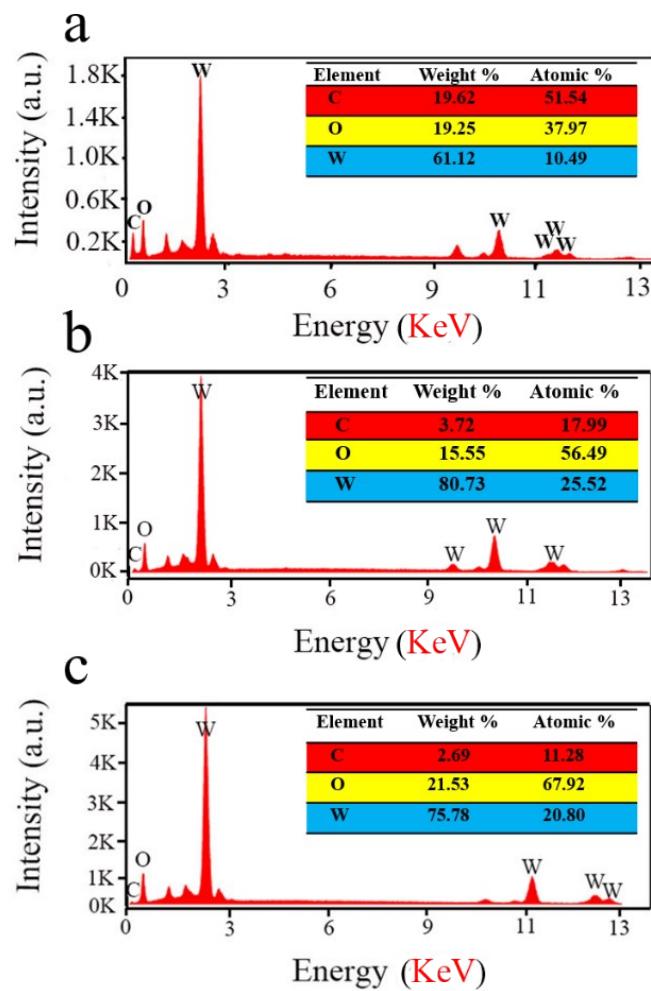

**Fig. S2** Energy-dispersive X-ray spectroscopy (EDS) analysis of (a) B-WO<sub>3</sub>-22, (b) B-WO<sub>3</sub>-04, (c) B-WO<sub>3</sub>-24.

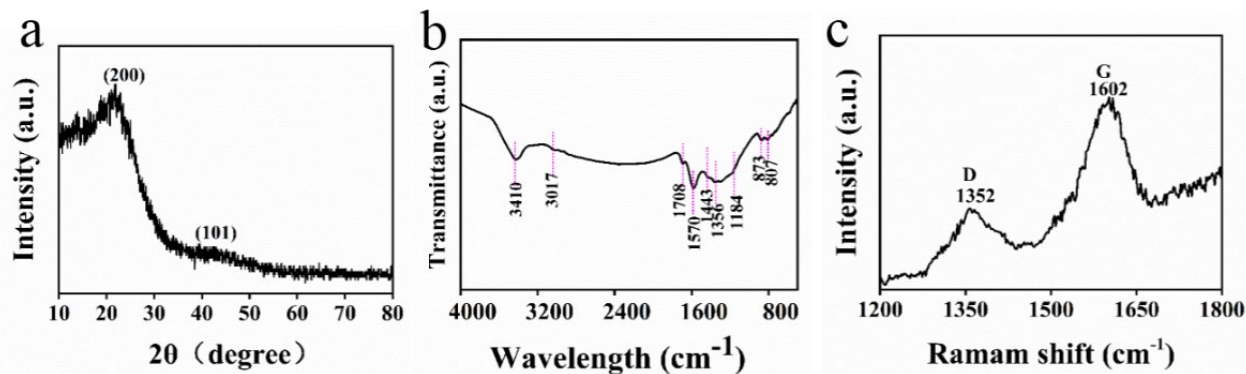

**Fig. S3** XRD, FTIR and Raman of biomass carbon.

Fig. S3a exhibited two broad peaks at around  $22^\circ$  corresponding to the (002) and  $43^\circ$  corresponding to the (100) plane of graphite, suggesting the formation of the carbon product with a limited graphitization degree. Fig. S3b shows a broad absorption bands around  $3410\text{ cm}^{-1}$  is assigned to the stretching vibrations of the O–H groups and the bending vibrations of a small quantity of adsorbed water molecules. And a weak absorbance around  $1708\text{ cm}^{-1}$  in the FTIR spectrum of biomass carbon, which might be attributed to the presence of the carboxylic ester (C=O) in pectin and waxes. The benzene ring and side chain of lignin have the inherent C=C bond of biomass and the absorption peak is located at  $1570\text{ cm}^{-1}$ . The carbon material prepared by nitric acid activation has a distinct peak here, indicating that the use of nitric acid can increase C=C. The observed peaks at  $1679$  and  $832\text{ cm}^{-1}$ , which are ascribed to a stretching vibration of C=O and  $\delta$ -CH. The bands at about  $1443\text{ cm}^{-1}$  are ascribed to the C–H inplane bending vibration. The presence of C–O bonds in various chemical surroundings have been shown to be within the  $1356\text{--}950\text{ cm}^{-1}$  range. It should be noted that the  $1184\text{ cm}^{-1}$  bands are normally ascribed to O–H bending vibrations.<sup>43-46</sup> The chemical functional group -COOH produced during the strong acid treatment (chemical oxidation) enhanced the hydrophilicity of biomass carbon and improved its dispersibility in the  $\text{WO}_3$  matrix.<sup>47-49</sup>



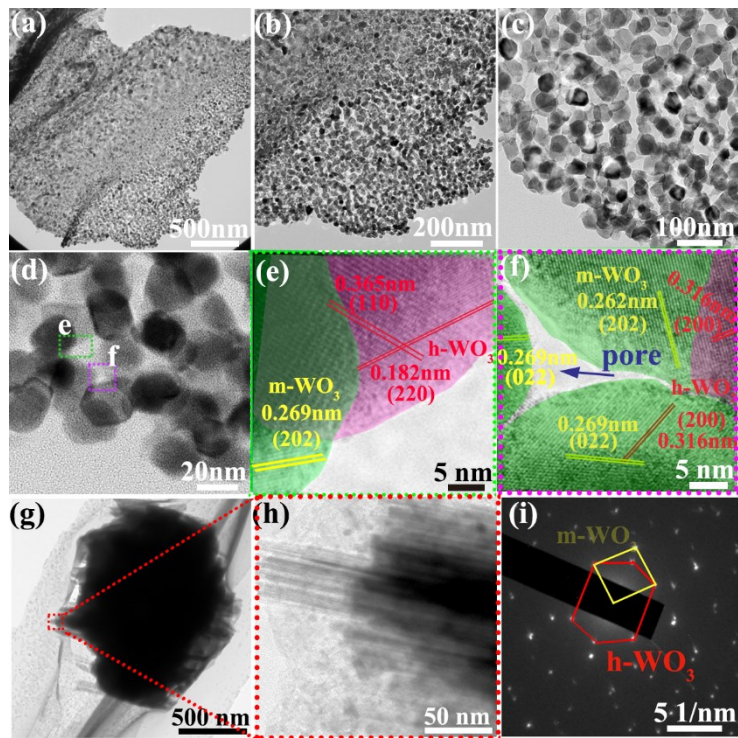

Fig. S4 The TEM/HRTEM/SAED pattern images of B-WO<sub>3</sub>-04.

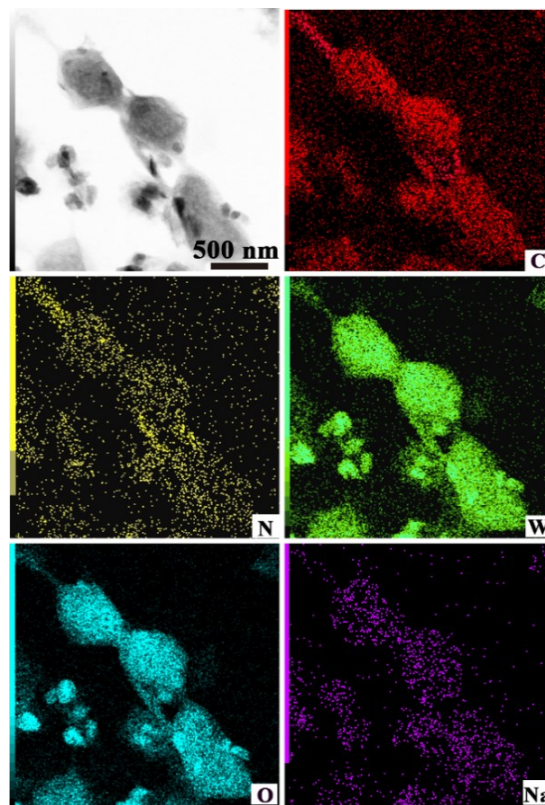

Fig. S5 The TEM Mapping images of B-WO<sub>3</sub>-04.

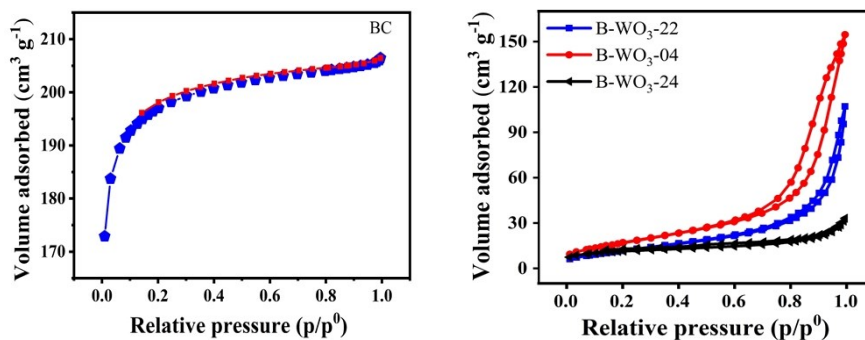

Fig. S6 Nitrogen adsorption-desorption isotherms of hemp-derived biomass carbon and B-WO<sub>3</sub>-ab.

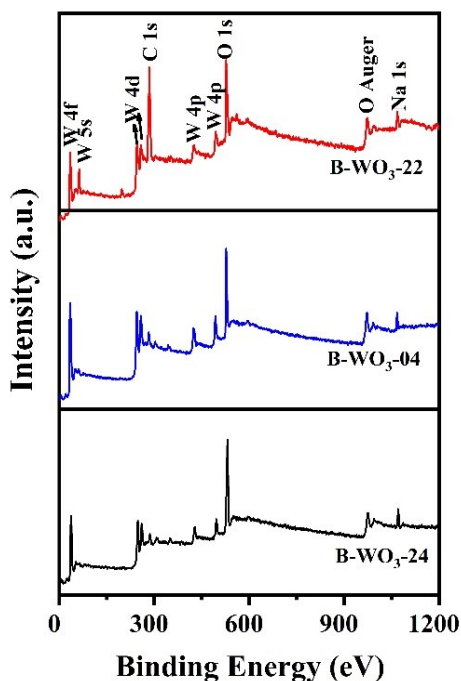

Fig. S7 Comparison of the XPS full spectra of B-WO<sub>3</sub>-22, B-WO<sub>3</sub>-04 and B-WO<sub>3</sub>-24.

Table S6 Contents of C, O, W, and Na in XPS of B-WO<sub>3</sub>-22, B-WO<sub>3</sub>-04 and B-WO<sub>3</sub>-24.

| Samples               | C (at%) | O (at%) | W (at%) | Na (at%) |
|-----------------------|---------|---------|---------|----------|
| B-WO <sub>3</sub> -22 | 55.42   | 29.81   | 12.45   | 2.32     |
| B-WO <sub>3</sub> -04 | 16.43   | 52.83   | 27.23   | 3.51     |
| B-WO <sub>3</sub> -24 | 12.66   | 59.62   | 23.57   | 4.15     |

**Table S7** Response, response time and recovery time of B-WO<sub>3</sub>-22, B-WO<sub>3</sub>-04, and B-WO<sub>3</sub>-24 sensors.

| Sensors<br>NO <sub>2</sub> (ppm) | B-WO <sub>3</sub> -22 |                |                | B-WO <sub>3</sub> -04 |                |                | B-WO <sub>3</sub> -24 |                |                |
|----------------------------------|-----------------------|----------------|----------------|-----------------------|----------------|----------------|-----------------------|----------------|----------------|
|                                  | R                     | T <sub>s</sub> | T <sub>r</sub> | R                     | T <sub>s</sub> | T <sub>r</sub> | R                     | T <sub>s</sub> | T <sub>r</sub> |
| 100                              | 57.45                 | 6.40           | 29.2           | 71.07                 | 3              | 11.6           | 37.52                 | 7.13           | 36.4           |
| 50                               | 51.72                 | 9.07           | 37.6           | 60.09                 | 4.53           | 21.2           | 35.45                 | 7.60           | 46.8           |
| 30                               | 45.52                 | 10.13          | 53.6           | 51.09                 | 4.97           | 22             | 30.72                 | 8.40           | 48.8           |
| 10                               | 21.92                 | 11.73          | 53.2           | 27.49                 | 6              | 31.8           | 22.92                 | 9.13           | 53.2           |
| 5                                | 16.48                 | 11.27          | 56             | 17.29                 | 7.27           | 32             | 12.48                 | 9.80           | 51.2           |
| 3                                | 4.29                  | 11.73          | 53.2           | 5.69                  | 7              | 42.4           | 4.29                  | 10.07          | 52.4           |
| 1                                | 2.39                  | 13.87          | 37.2           | 2.63                  | 9              | 46             | 2.39                  | 11.73          | 52.8           |
| 0.5                              | 1.98                  | 12.27          | 37.4           | 2.52                  | 9.96           | 48.6           | 1.98                  | 13.87          | 67.6           |
| 0.3                              | 1.84                  | 14.27          | 42.4           | 2.08                  | 12.8           | 45.6           | 1.34                  | 14.27          | 40.4           |
| 0.1                              | 1.38                  | 15.73          | 37             | 1.65                  | 12.27          | 28.4           | 1.18                  | 14.80          | 42.8           |
| 0.05                             | 1.12                  | 16.40          | 29.2           | 1.38                  | 11.2           | 20.8           |                       |                |                |

\*R: Response T<sub>s</sub>: Response time T<sub>r</sub>: Recovery time

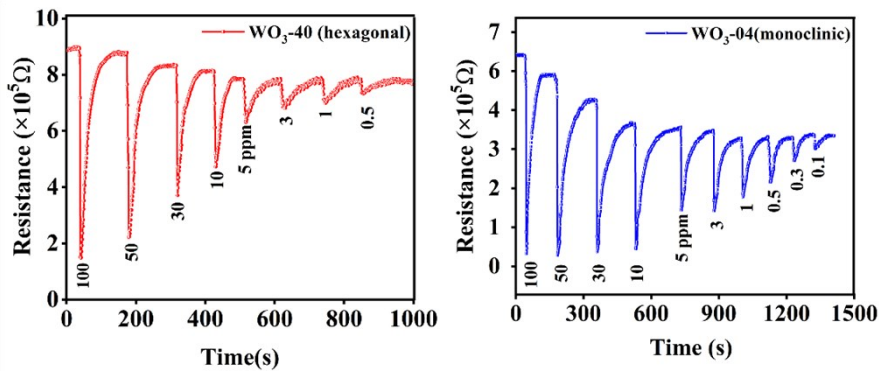

**Fig. S8** Dynamic response-recovery curve of pure WO<sub>3</sub>-40 and WO<sub>3</sub>-04.

**Table S8** Response, response time and recovery time of WO<sub>3</sub>-40 and WO<sub>3</sub>-04.

| Sensors<br>NO <sub>2</sub> (ppm) | WO <sub>3</sub> -40 |                |                | WO <sub>3</sub> -04 |                |                |
|----------------------------------|---------------------|----------------|----------------|---------------------|----------------|----------------|
|                                  | R                   | T <sub>s</sub> | T <sub>r</sub> | R                   | T <sub>s</sub> | T <sub>r</sub> |
| 100                              | 11.45               | 10.40          | 41.2           | 25.07               | 12             | 46.2           |
| 50                               | 10.72               | 10.07          | 47.6           | 21.59               | 14.53          | 50.6           |
| 30                               | 8.52                | 11.13          | 53.6           | 17.09               | 19.97          | 53.6           |
| 10                               | 6.92                | 12.73          | 53.2           | 8.49                | 26             | 63.2           |
| 5                                | 5.48                | 11.27          | 56             | 6.29                | 27.27          | 69             |
| 3                                | 4.29                | 12.53          | 53.2           | 5.69                | 27             | 73.2           |
| 1                                | 2.09                | 13.17          | 37.2           | 2.63                | 29             | 78.2           |
| 0.5                              | 1.18                | 14.57          | 37.4           | 2.12                | 29.96          | 77.4           |
| 0.3                              |                     |                |                | 1.68                | 22.8           | 71.2           |
| 0.1                              |                     |                |                | 1.05                | 22.27          | 66.8           |

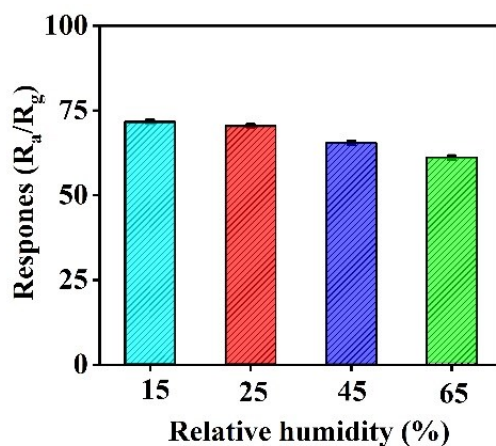

**Fig. S9** Response of the B-WO<sub>3</sub>-04 sensor to 100 ppm NO<sub>2</sub> as a function of the relative humidity.

**Table S9** Fitted impedance parameters of B-WO<sub>3</sub>-22, B-WO<sub>3</sub>-04, and B-WO<sub>3</sub>-24 samples.

| Samples               | B-WO <sub>3</sub> -22 | B-WO <sub>3</sub> -04 | B-WO <sub>3</sub> -24 |
|-----------------------|-----------------------|-----------------------|-----------------------|
| $R_s$ ( $\Omega$ )    | 78                    | 58                    | 61                    |
| $R_{ct}$ ( $\Omega$ ) | 834.9                 | 537.8                 | 691.6                 |

## References

1. T. Li, Y. Shen, S. Zhao, X. Zhong, W. Zhang, C. Han, D. Wei, D. Meng and Y. Ao, *Journal of Alloys and Compounds*, 2019, 783, 103-112.
2. W.-T. Koo, S.-J. Choi, N.-H. Kim, J.-S. Jang and I.-D. Kim, *Sensors and Actuators B: Chemical*, 2016, 223, 301-310.
3. B. Behera and S. Chandra, *Materials Science in Semiconductor Processing*, 2018, 86, 79-84.
4. Z. Wang, M. Hu, Y. Wei, J. Liu and Y. Qin, *Applied Surface Science*, 2016, 362, 525-531.
5. S. S. Shendage, V. L. Patil, S. P. Patil, S. A. Vanalakar, J. L. Bhosale, J. H. Kim and P. S. Patil, *Journal of Analytical and Applied Pyrolysis*, 2017, 125, 9-16.
6. S. S. Shendage, V. L. Patil, S. A. Vanalakar, S. P. Patil, N. S. Harale, J. L. Bhosale, J. H. Kim and P. S. Patil, *Sensors and Actuators B: Chemical*, 2017, 240, 426-433.
7. B. Xiao, D. Wang, F. Wang, Q. Zhao, C. Zhai and M. Zhang, *Ceramics International*, 2017, 43, 8183-8189.
8. Z. Wang, D. Wang and J. Sun, *Sensors and Actuators B: Chemical*, 2017, 245, 828-834.
9. V. V. Ganbavle, S. V. Mohite, J. H. Kim and K. Y. Rajpure, *Current Applied Physics*, 2015, 15, 84-93.
10. Z. Wang, P. Sun, T. Yang, Y. Gao, X. Li, G. Lu and Y. Du, *Sensors and Actuators B: Chemical*, 2013, 186, 734-740.

11. J.-S. Kim, J.-W. Yoon, Y. J. Hong, Y. C. Kang, F. Abdel-Hady, A. A. Wazzan and J.-H. Lee, *Sensors and Actuators B: Chemical*, 2016, 229, 561-569.
12. Z. Meng, A. Fujii, T. Hashishin, N. Wada, T. Sanada, J. Tamaki, K. Kojima, H. Haneoka and T. Suzuki, *Journal of Materials Chemistry C*, 2015, 3, 1134-1141.
13. X. Jie, D. Zeng, J. Zhang, K. Xu, J. Wu, B. Zhu and C. Xie, *Sensors and Actuators B: Chemical*, 2015, 220, 201-209.
14. Parag V. Adhyapak, A. D. Bang, P. More and N. R. Munirathnam, *RSC Advances*, 2018, 8, 34035-34040.
15. W. Liu, L. Xu, K. Sheng, C. Chen, X. Zhou, B. Dong, X. Bai, S. Zhang, G. Lu and H. Song, *Journal of Materials Chemistry A*, 2018, 6, 10976-10989.
16. S. Zhao, Y. Shen, P. Zhou, X. Zhong, C. Han, Q. Zhao and D. Wei, *Sensors and Actuators B: Chemical*, 2019, 282, 917-926.
17. J. Qi, K. Chen, Y. Xing, H. Fan, H. Zhao, J. Yang, L. Li, B. Yan, J. Zhou, L. Guo and S. Yang, *Nanoscale*, 2018, 10, 7440-7450.
18. H. Zhang, Y. Wang, X. Zhu, Y. Li and W. Cai, *Sensors and Actuators B: Chemical*, 2019, 280, 192-200.
19. T. Li, Y. Shen, X. Zhong, S. Zhao, G. Li, B. Cui, D. Wei and K. Wei, *Journal of Alloys and Compounds*, 2020, 818, 152927.
20. J. Sun, L. Sun, N. Han, J. Pan, W. Liu, S. Bai, Y. Feng, R. Luo, D. Li and A. Chen, *Sensors and Actuators B: Chemical*, 2019, 285, 68-75.
21. Y. Shen, T. Li, X. Zhong, G. Li, A. Li, D. Wei, Y. Zhang and K. Wei, *Vacuum*, 2020, 172, 109036.
22. Y. Liu, Y. Li, F. Peng, Y. Lin, S. Yang, S. Zhang, H. Wang, Y. Cao and H. Yu, *Applied Catalysis B: Environmental*, 2019, 241, 236-245.
23. P. Bamola, A. Bhoumik, C. Dwivedi, V. Kaushik and H. Sharma, *Materials Today: Proceedings*, 2020, DOI: 10.1016/j.matpr.2020.01.046.
24. C. Ai, P. Xie, X. Zhang, X. Zheng, J. Li, A. Kafizas and S. Lin, *ACS Sustainable Chemistry & Engineering*, 2019, 7, 5274-5282.
25. T. Sun, H. Zhang, X. Wang, J. Liu, C. Xiao, S. U. Nanayakkara, J. L. Blackburn, M. V. Mirkin and E. M. Miller, *Nanoscale Horizons*, 2019, 4, 619-624.
26. Y. Wang, W. Cui, J. Yu, Y. Zhi, H. Li, Z. Y. Hu, X. Sang, E. J. Guo, W. Tang and Z. Wu, *ACS Appl Mater Interfaces*, 2019, 11, 45922-45929.
27. S. Wu, W. Wang, W. Tu, S. Yin, Y. Sheng, M. Y. Manuputty, M. Kraft and R. Xu, *ACS Sustainable Chemistry &*

Engineering, 2018, 6, 14470-14479.

28. D. Edwards, N. Browne, K. M. Holsgrove, A. B. Naden, S. O. Sayedaghaee, B. Xu, S. Prosandeev, D. Wang, D. Mazumdar, M. Duchamp, A. Gupta, S. V. Kalinin, M. Arredondo, R. G. P. McQuaid, L. Bellaiche, J. M. Gregg and A. Kumar, *Nanoscale*, 2018, 10, 19638-19638.
29. Y. H. Chew, J. Y. Tang, L. J. Tan, B. W. J. Choi, L. L. Tan and S. P. Chai, *Chem Commun (Camb)*, 2019, 55, 6265-6268.
30. Y. Gao, J. Zhu, H. An, P. Yan, B. Huang, R. Chen, F. Fan and C. Li, *J Phys Chem Lett*, 2017, 8, 1419-1423.
31. Y. Min, X. Yang, D. Wang, K. Yang, S. Zheng, S. Li, H. Chen, J. Liang and F. Pan, *Catalysis Science & Technology*, 2019, 9, 6027-6036.
32. Z. Luo, A. S. Poyraz, C.-H. Kuo, R. Miao, Y. Meng, S.-Y. Chen, T. Jiang, C. Wenos and S. L. Suib, *Chemistry of Materials*, 2014, 27, 6-17.
33. M.-G. Ju, X. Wang, W. Liang, Y. Zhao and C. Li, *J. Mater. Chem. A*, 2014, 2, 17005-17014.
34. Z. Lu, Y. Li, T. Liu, G. Wang, M. Sun, Y. Jiang, H. He, Y. Wang, P. Zou, X. Wang, Q. Zhao and H. Rao, *Chemical Engineering Journal*, 2020, 389, 124417.
35. S. Dong, W. Tang, P. Hu, X. Zhao, X. Zhang, J. Han and P. Hu, *ACS Sustainable Chemistry & Engineering*, 2019, 7, 11795-11805.
36. H. B. Na, X. F. Zhang, Z. P. Deng, Y. M. Xu, L. H. Huo and S. Gao, *ACS Appl Mater Interfaces*, 2019, 11, 11627-11635.
37. H. Ren, L. Yan, M. Liu, Y. Wang, X. Liu, C. Liu, K. Liu, L. Zeng and A. Liu, *Sensors and Actuators B: Chemical*, 2019, 296, 126517.
38. D. H. Kim, J. S. Jang, W. T. Koo, S. J. Choi, H. J. Cho, M. H. Kim, S. J. Kim and I. D. Kim, *ACS Sens*, 2018, 3, 1164-1173.
39. F. Quan, J. Zhang, D. Li, Y. Zhu, Y. Wang, Y. Bu, Y. Qin, Y. Xia, S. Komarneni and D. Yang, *ACS Sustainable Chemistry & Engineering*, 2018, 6, 14911-14918.
40. Y. Xiong, C. Wang, C. Jin, Q. Sun and M. Xu, *ACS Sustainable Chemistry & Engineering*, 2018, 6, 13897-13906.
41. D. Li, Y. Sun, S. Chen, J. Yao, Y. Zhang, Y. Xia and D. Yang, *ACS Appl Mater Interfaces*, 2018, 10, 17175-17182.
42. Y. Zou, S. Chen, J. Sun, J. Liu, Y. Che, X. Liu, J. Zhang and D. Yang, *ACS Sens*, 2017, 2, 897-902.
43. F. Ma, J. Li, W. Li, N. Lin, L. Wang and J. Qiao, *Chem Sci*, 2017, 8, 800-805.
44. Q. Hao, T. Liu, J. Liu, Q. Liu, X. Jing, H. Zhang, G. Huang and J. Wang, *RSC Advances*, 2017, 7, 14192-14199.
45. S. Bai, Y. Ma, X. Shu, J. Sun, Y. Feng, R. Luo, D. Li and A. Chen, *Industrial & Engineering Chemistry Research*,

2017, 56, 2616-2623.

46. D. Dai and M. Fan, *Materials Sciences and Applications*, 2010, 01, 336-342.
47. W. J. Zhao, Q. X. Hu, N. N. Zhang, Y. C. Wei, Q. Zhao, Y. M. Zhang, J. B. Dong, Z. Y. Sun, B. J. Liu, L. Li and W. Hu, *RSC Advances*, 2017, 7, 32236-32245.
48. W. Fang, Y. Yang, H. Yu, X. Dong, T. Wang, J. Wang, Z. Liu, B. Zhao and M. Yang, *RSC Advances*, 2016, 6, 106880-106886.
49. N. Lu, R. H. Swan and I. Ferguson, *Journal of Composite Materials*, 2011, 46, 1915-1924.
